# Supplementary material for: Seasonal variation and light absorption property of carbonaceous aerosol in a typical glacier region of the southeastern Tibetan Plateau
Source: Copernicus journal article supplement (doi:10.5194/acp-18-6441-2018), 2018-05-07
Supplement: Supplementary file 1 [file acp-18-6441-2018-supplement.zip]

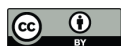

## *Supplement of*

# **Seasonal variation and light absorption property of carbonaceous aerosol in a typical glacier region of the southeastern Tibetan Plateau**

**Hewen Niu et al.**

*Correspondence to:* Shichang Kang (shichang.kang@lzb.ac.cn) and Hailong Wang (hailong.wang@pnnl.gov)

- [acp-18-6441-2018-supplement-title-page.pdf](#)
- [EC-OC data of Yulong and Ganhaizi aerosol.xls](#)

The copyright of individual parts of the supplement might differ from the CC BY 4.0 License.
